# Supplementary material for: Biosynthesis and Properties of a P(3HB-co-3HV-co-4HV) Produced by Cupriavidus necator B-10646
Source: MDPI journal article supplement (doi:10.3390/polym14194226), 2022-10-09
Supplement: s1 [file s1]

# Biosynthesis and Properties of a P(3HB-co-3HV-co-4HV) Produced by *Cupriavidus necator* B-10646

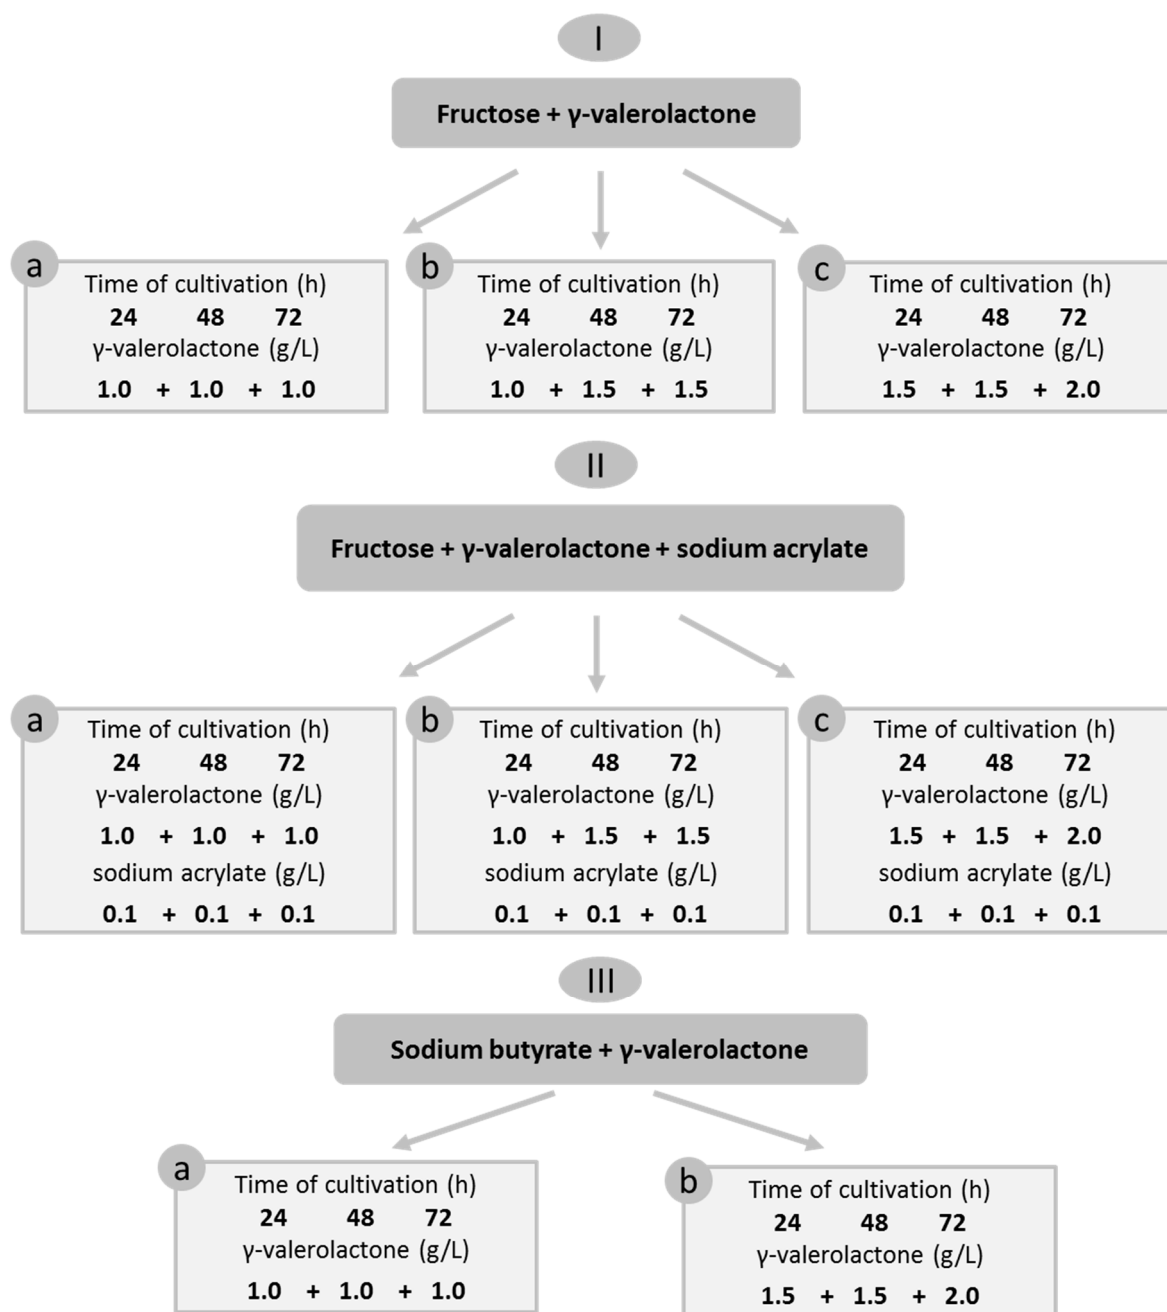

**Figure S1.** Strategies of adding  $\gamma$ -valerolactone (and sodium acrylate) in split portions during cultivation of *Cupriavidus necator* B-10646 on fructose or sodium butyrate.
